# Supplementary material for: Transition-state correlations for predicting thermochemistry of adsorbates and surface reactions
Source: Royal Society of Chemistry journal article supplement (doi:10.1039/d2cp04425k), 2023-01-01
Supplement: d2cp04425k1.pdf [file d2cp04425k1.pdf]

## Supporting Information

# Transition-State Correlations for Predicting Thermochemistry of Adsorbates and Surface Reactions

Sophia J. Kurdziel<sup>1</sup> and Dionisios G. Vlachos<sup>1,2\*</sup>

<sup>1</sup>*Department of Chemical and Biomolecular Engineering, University of Delaware, 150 Academy Street, Newark, DE  
19716*

<sup>2</sup>*Catalysis Center for Energy Innovation, RAPID Manufacturing Institute, Delaware Energy Institute (DEI),  
University of Delaware, 221 Academy Street, Newark, DE 19716*

\*Corresponding author: [vlachos@udel.edu](mailto:vlachos@udel.edu)

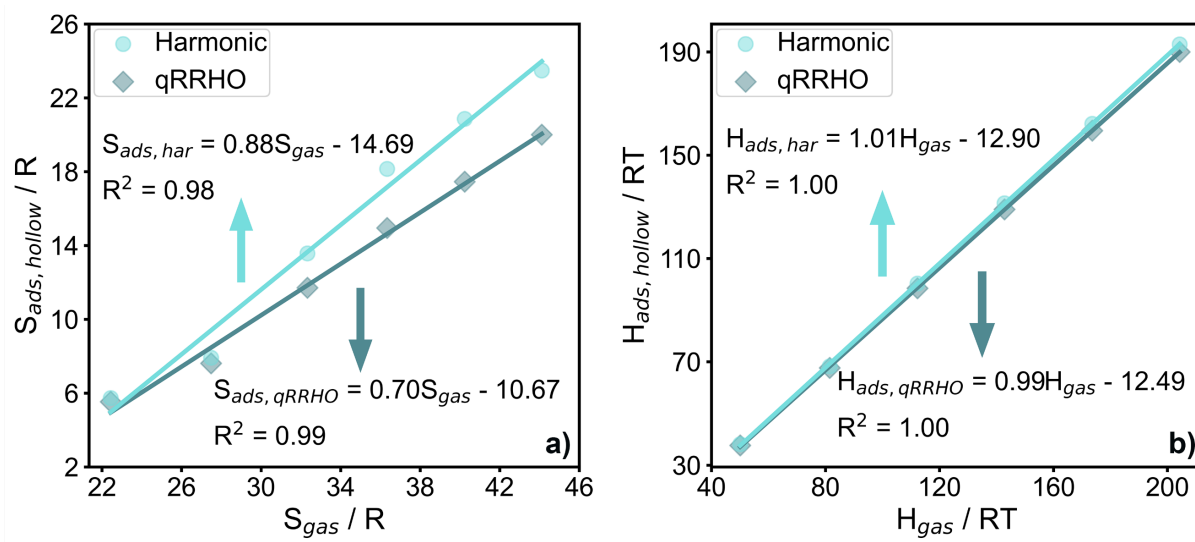

**Figure S1.** Thermochemical scaling for C<sub>1</sub>-C<sub>6</sub> alkyl chains adsorbed in the fcc hollow site of Cu(111) (and Ni(111) for ethyl only) against gas-phase *n*-alkanes. For **a)** entropies ( $S_{ads}$ ) and **b)** enthalpies ( $H_{ads}$ ) thermochemistry is calculated using the harmonic approximation (circles) or the quasi-rigid rotor harmonic oscillator (qRRHO) approximation (diamonds) at 298.15 K. Slopes, y-intercepts, and fits are rounded to two decimal places for brevity. The Ni(111) surface is used for ethyl adsorption due to instability (multiple imaginary modes) of ethyl in the Cu(111) hollow site.

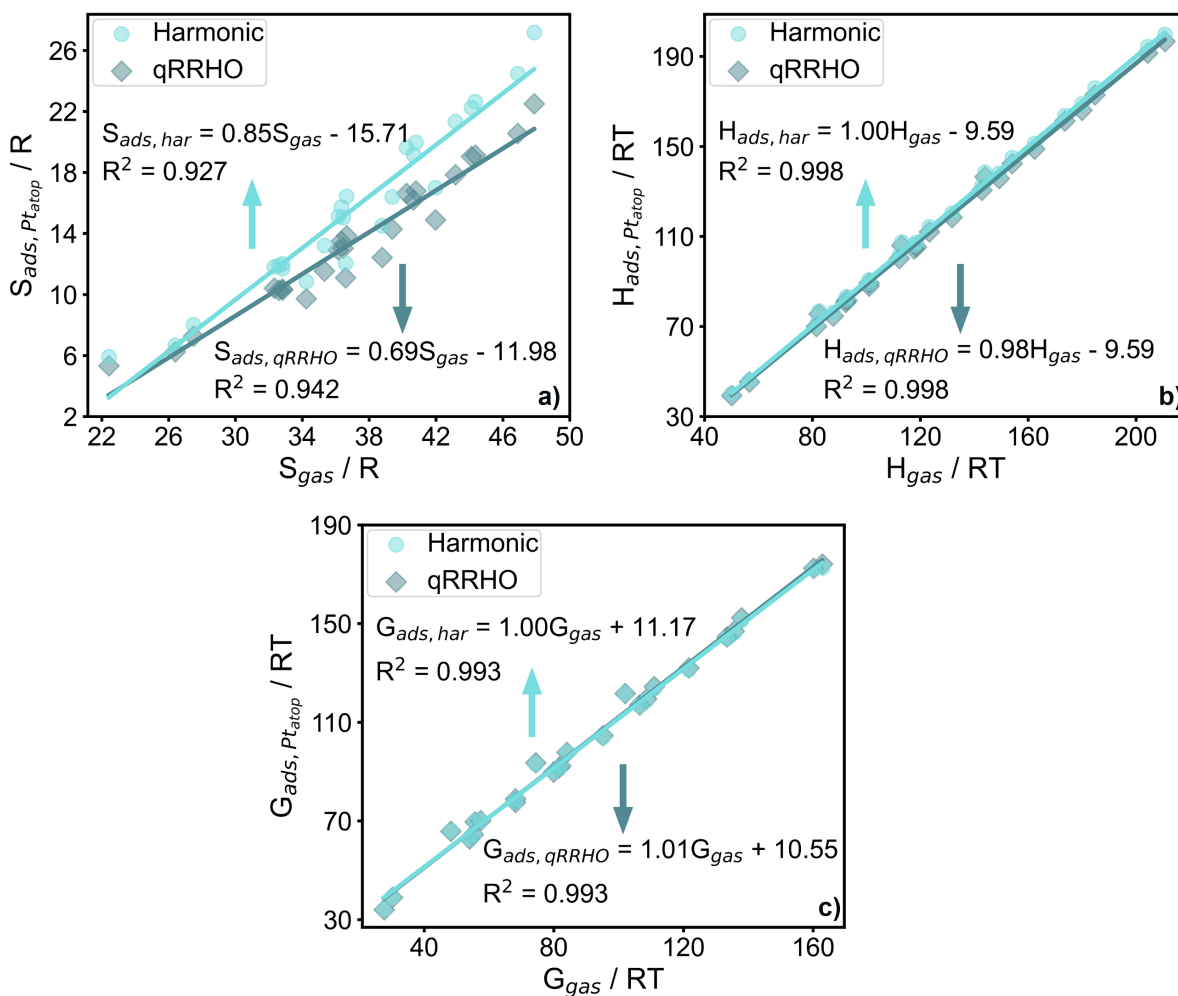

**Figure S2.** Thermochemical scaling for species adsorbed on the atop site of Pt(111) surfaces against gas-phase entropies. For **a)** entropies ( $S_{ads}$ ), **b)** enthalpies ( $H_{ads}$ ), and **c)** Gibbs energies ( $G_{ads}$ ) thermochemistry is calculated using the harmonic approximation (circles) or the quasi-rigid rotor harmonic oscillator (qRRHO) approximation (diamonds) at 298.15 K.

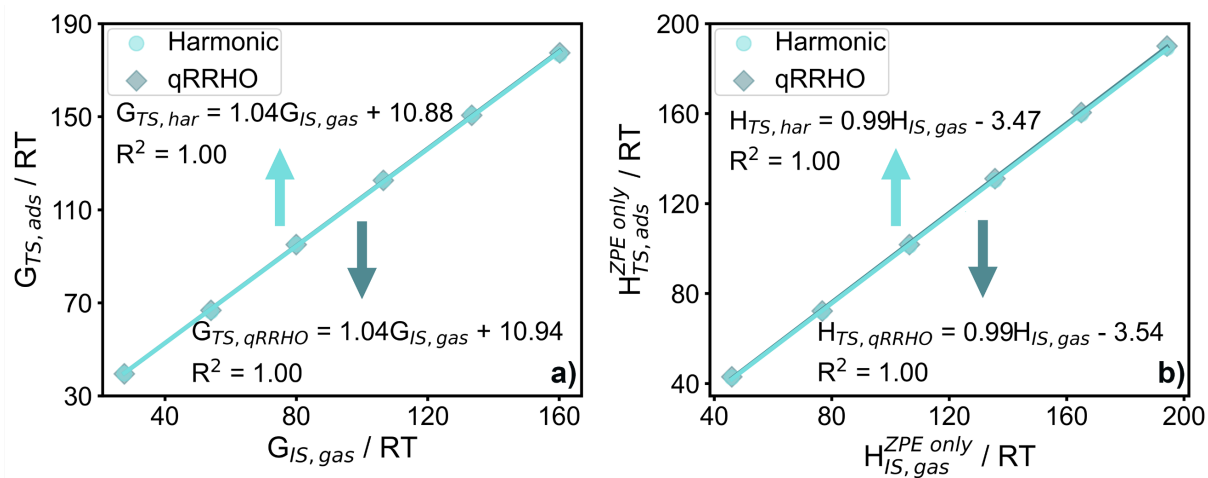

**Figure S3. a)** Gibbs energy scaling of transition states (TSs) with initial states (ISs) in the gas-phase for C<sub>1</sub>-C<sub>6</sub> dehydrogenation reactions on Pt(111). **b)** Zero point energy (ZPE) scaling between TSs and ISs in the gas phase for the same reaction series. Harmonic (circles) and quasi-rigid rotor harmonic oscillator (diamonds) models are used; quantities calculated at 298.15 K. Slopes, y-intercepts, and fits are rounded to two decimal places for brevity.

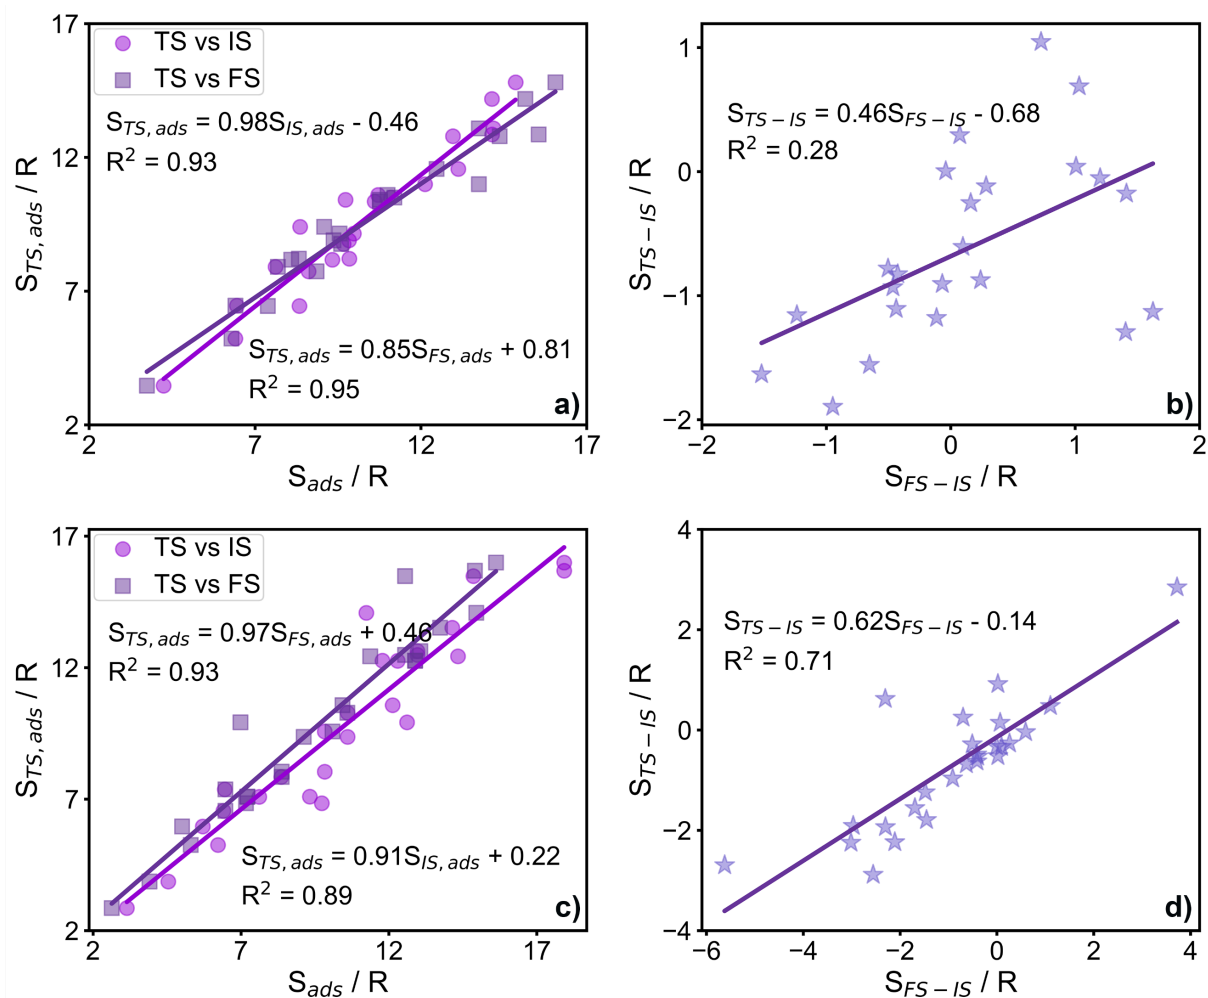

**Figure S4.** Entropic scaling of either initial (IS) or final (FS) states with transition (TS) states of **a)** C-C or **c)** C-H bond scissions for DFT-obtained data of propane / ethane hydrogenolysis on Ru(0001) calculated at 473.15 K. Analogous to an energy-scaling BEP relationship, for the same **b)** C-C and **d)** C-H bond scission reactions, the entropy of the transition state – initial state is plotted against the entropy of the final state – initial state.

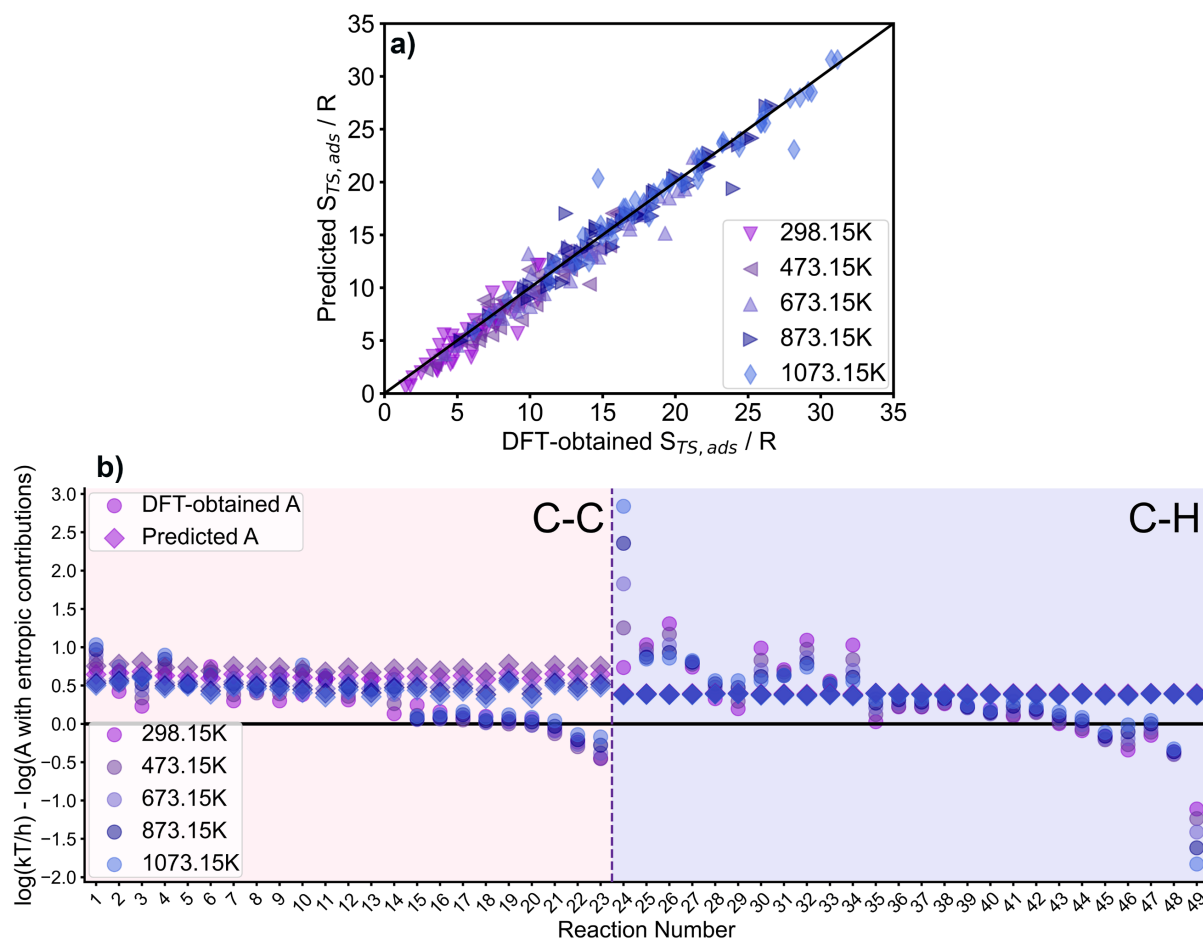

**Figure S5.** **a)** Parity plot of transition state entropies predicted from linear regressions in Figure 4 of the main text plotted against transition state entropies calculated from exact DFT data at varying temperatures. **b)** Difference between the log of  $\frac{k_b T}{h}$  and the log of the pre-exponential ( $A$ ) computed using entropic contributions either obtained from exact DFT data or from the linear regressions in Figure 4 of the main text. The reactions are numbered arbitrarily as integers except to distinguish between C-C and C-H reactions; reactions 1-23 are C-C bond scissions and reactions 24-49 are C-H bond scissions. Pre-exponentials are in units of  $s^{-1}$ .

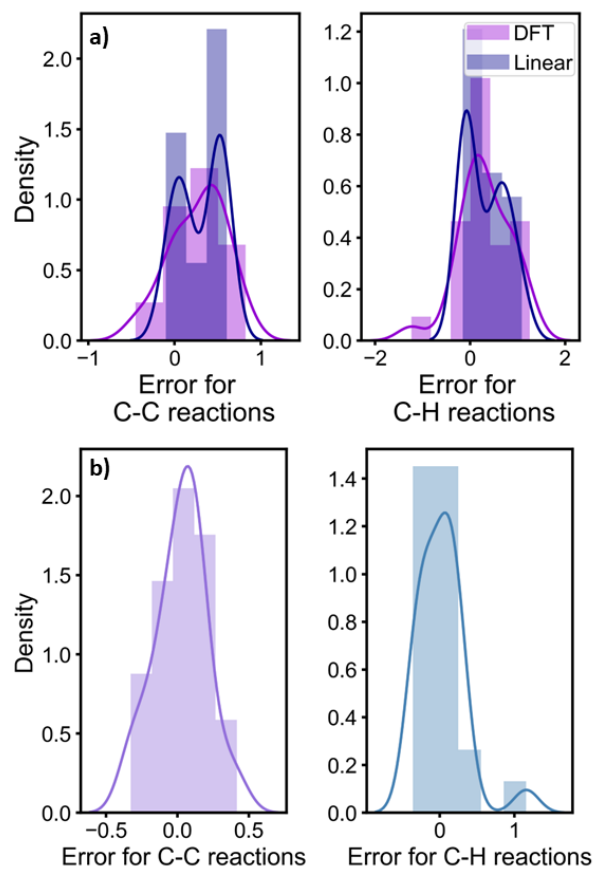

**Figure S6.** **a)** Distribution of errors between the  $\log$  of  $\frac{k_b T}{h}$  and the  $\log$  of the pre-exponential computed using entropic contributions either obtained from exact DFT data or from linear regressions for C-C and C-H bond scission steps. **b)** Distribution of errors between the  $\log$  of the pre-exponential calculated from exact DFT data minus that calculated from linear regressions for C-C and C-H bond scission steps. Pre-exponentials computed at 473.15 K. Pre-exponentials are in units of  $s^{-1}$ .

**Table S1.** Gas-phase / adsorbate entropies calculated at 298.15 K using the quasi-rigid rotor harmonic oscillator (qRRHO) or harmonic oscillator (HO) models on fcc(111) surface sites. (##) Denotes if 1 small imaginary mode ( $< 50i$  cm<sup>-1</sup>) was present and replaced with 20 cm<sup>-1</sup>.

| Gas-Phase Species                             | $S_{gas} / R$ | Adsorbate                                       | Surface / Adsorption Site | $S_{ads} / R$<br>HO | $S_{ads} / R$<br>qRRHO |
|-----------------------------------------------|---------------|-------------------------------------------------|---------------------------|---------------------|------------------------|
| CH <sub>4</sub>                               | 22.43         | CH <sub>3</sub> *                               | Pt / atop                 | 5.92                | 5.33                   |
| C <sub>2</sub> H <sub>6</sub>                 | 27.48         | C <sub>2</sub> H <sub>5</sub> *                 | Pt / atop                 | 8.02                | 7.27                   |
| C <sub>3</sub> H <sub>8</sub>                 | 32.33         | C <sub>3</sub> H <sub>7</sub> *                 | Pt / atop                 | 11.81               | 10.41                  |
| C <sub>4</sub> H <sub>10</sub>                | 36.34         | C <sub>4</sub> H <sub>9</sub> *                 | Pt / atop                 | 15.74               | 13.50                  |
| C <sub>5</sub> H <sub>12</sub>                | 40.24         | C <sub>5</sub> H <sub>11</sub> *                | Pt / atop                 | 19.64               | 16.62                  |
| C <sub>6</sub> H <sub>14</sub>                | 44.12         | C <sub>6</sub> H <sub>13</sub> * ##             | Pt / atop                 | 22.25               | 19.05                  |
| CH <sub>4</sub>                               | 22.43         | CH <sub>3</sub> *                               | Rh / atop                 | 5.89                | 5.43                   |
| C <sub>2</sub> H <sub>6</sub>                 | 27.48         | C <sub>2</sub> H <sub>5</sub> *                 | Rh / atop                 | 8.74                | 7.79                   |
| C <sub>3</sub> H <sub>8</sub>                 | 32.33         | C <sub>3</sub> H <sub>7</sub> *                 | Rh / atop                 | 11.69               | 10.56                  |
| C <sub>4</sub> H <sub>10</sub>                | 36.34         | C <sub>4</sub> H <sub>9</sub> *                 | Rh / atop                 | 15.90               | 13.76                  |
| C <sub>5</sub> H <sub>12</sub>                | 40.24         | C <sub>5</sub> H <sub>11</sub> *                | Rh / atop                 | 18.52               | 16.27                  |
| C <sub>6</sub> H <sub>14</sub>                | 44.12         | C <sub>6</sub> H <sub>13</sub> *                | Rh / atop                 | 22.75               | 19.49                  |
| CH <sub>4</sub>                               | 22.43         | CH <sub>3</sub> *                               | Cu / fcc                  | 5.74                | 5.53                   |
| C <sub>2</sub> H <sub>6</sub>                 | 27.48         | C <sub>2</sub> H <sub>5</sub> *                 | Ni / fcc                  | 7.92                | 7.61                   |
| C <sub>3</sub> H <sub>8</sub>                 | 32.33         | C <sub>3</sub> H <sub>7</sub> *                 | Cu / fcc                  | 13.57               | 11.71                  |
| C <sub>4</sub> H <sub>10</sub>                | 36.34         | C <sub>4</sub> H <sub>9</sub> * ##              | Cu / fcc                  | 18.15               | 14.95                  |
| C <sub>5</sub> H <sub>12</sub>                | 40.24         | C <sub>5</sub> H <sub>11</sub> *                | Cu / fcc                  | 20.86               | 17.45                  |
| C <sub>6</sub> H <sub>14</sub>                | 44.12         | C <sub>6</sub> H <sub>13</sub> * ##             | Cu / fcc                  | 23.48               | 20.00                  |
| C <sub>2</sub> H <sub>5</sub> OH              | 32.59         | C <sub>2</sub> H <sub>5</sub> O*                | Pt / atop                 | 11.90               | 10.27                  |
| C <sub>3</sub> H <sub>7</sub> OH              | 36.44         | C <sub>3</sub> H <sub>7</sub> O*                | Pt / atop                 | 15.04               | 13.04                  |
| C <sub>4</sub> H <sub>9</sub> OH              | 40.65         | C <sub>4</sub> H <sub>9</sub> O*                | Pt / atop                 | 19.16               | 16.20                  |
| C <sub>5</sub> H <sub>11</sub> OH             | 44.35         | C <sub>5</sub> H <sub>11</sub> O*               | Pt / atop                 | 22.65               | 19.14                  |
| C <sub>6</sub> H <sub>13</sub> OH             | 47.88         | C <sub>6</sub> H <sub>13</sub> O* ##            | Pt / atop                 | 27.18               | 22.51                  |
| C <sub>3</sub> H <sub>6</sub> O               | 35.32         | C <sub>3</sub> H <sub>5</sub> O*                | Pt / atop                 | 13.20               | 11.54                  |
| C <sub>4</sub> H <sub>8</sub> O               | 39.37         | C <sub>4</sub> H <sub>7</sub> O*                | Pt / atop                 | 16.40               | 14.28                  |
| C <sub>5</sub> H <sub>10</sub> O              | 43.16         | C <sub>5</sub> H <sub>9</sub> O*                | Pt / atop                 | 21.33               | 17.84                  |
| C <sub>6</sub> H <sub>12</sub> O              | 46.89         | C <sub>6</sub> H <sub>11</sub> O*               | Pt / atop                 | 24.48               | 20.56                  |
| (CH <sub>3</sub> ) <sub>2</sub> CHOH          | 36.16         | (CH <sub>3</sub> ) <sub>2</sub> CHO*            | Pt / atop                 | 15.12               | 12.92                  |
| (CH <sub>3</sub> ) <sub>2</sub> CO            | 36.59         | CH <sub>3</sub> COCH <sub>2</sub> *             | Pt / atop                 | 12.05               | 11.10                  |
| C <sub>2</sub> H <sub>4</sub>                 | 26.40         | C <sub>2</sub> H <sub>3</sub> *                 | Pt / atop                 | 6.67                | 6.25                   |
| C <sub>3</sub> H <sub>6</sub>                 | 34.24         | C <sub>3</sub> H <sub>5</sub> *                 | Pt / atop                 | 10.85               | 9.72                   |
| C <sub>4</sub> H <sub>8</sub>                 | 38.78         | C <sub>4</sub> H <sub>7</sub> *                 | Pt / atop                 | 14.52               | 12.43                  |
| C <sub>5</sub> H <sub>10</sub>                | 41.97         | C <sub>5</sub> H <sub>9</sub> *                 | Pt / atop                 | 16.99               | 14.89                  |
| C <sub>2</sub> H <sub>5</sub> NH <sub>2</sub> | 32.82         | C <sub>2</sub> H <sub>5</sub> NH*               | Pt / atop                 | 11.70               | 10.36                  |
| C <sub>2</sub> H <sub>5</sub> NH <sub>2</sub> | 32.82         | C <sub>2</sub> H <sub>4</sub> NH <sub>2</sub> * | Pt / atop                 | 12.01               | 10.29                  |



|                                               |       |                                      |           |       |       |
|-----------------------------------------------|-------|--------------------------------------|-----------|-------|-------|
| C <sub>3</sub> H <sub>7</sub> NH <sub>2</sub> | 36.65 | C <sub>3</sub> H <sub>7</sub> NH*    | Pt / atop | 16.43 | 13.84 |
| C <sub>4</sub> H <sub>9</sub> NH <sub>2</sub> | 40.79 | C <sub>4</sub> H <sub>9</sub> NH* ## | Pt / atop | 19.96 | 16.79 |

**Table S2.** Gas-phase / adsorbate enthalpic corrections calculated at 298.15 K using the quasi-rigid rotor harmonic oscillator (qRRHO) or harmonic oscillator (HO) models on fcc(111) surface sites. (##) Denotes if 1 small imaginary mode ( $< 50i$  cm<sup>-1</sup>) was present and replaced with 20 cm<sup>-1</sup>.

| Gas-Phase Species                    | $H_{gas} / RT$ | Adsorbate                            | Surface / Adsorption Site | $H_{ads} / RT$ HO | $H_{ads} / RT$ qRRHO |
|--------------------------------------|----------------|--------------------------------------|---------------------------|-------------------|----------------------|
| CH <sub>4</sub>                      | 50.08          | CH <sub>3</sub> *                    | Pt / atop                 | 40.14             | 39.33                |
| C <sub>2</sub> H <sub>6</sub>        | 81.48          | C <sub>2</sub> H <sub>5</sub> *      | Pt / atop                 | 70.95             | 70.01                |
| C <sub>3</sub> H <sub>8</sub>        | 112.26         | C <sub>3</sub> H <sub>7</sub> *      | Pt / atop                 | 101.76            | 100.28               |
| C <sub>4</sub> H <sub>10</sub>       | 142.82         | C <sub>4</sub> H <sub>9</sub> *      | Pt / atop                 | 132.54            | 130.54               |
| C <sub>5</sub> H <sub>12</sub>       | 173.64         | C <sub>5</sub> H <sub>11</sub> *     | Pt / atop                 | 163.66            | 161.27               |
| C <sub>6</sub> H <sub>14</sub>       | 204.29         | C <sub>6</sub> H <sub>13</sub> * ##  | Pt / atop                 | 194.34            | 191.48               |
| CH <sub>4</sub>                      | 50.08          | CH <sub>3</sub> *                    | Rh / atop                 | 39.23             | 38.50                |
| C <sub>2</sub> H <sub>6</sub>        | 81.48          | C <sub>2</sub> H <sub>5</sub> *      | Rh / atop                 | 70.04             | 68.93                |
| C <sub>3</sub> H <sub>8</sub>        | 112.26         | C <sub>3</sub> H <sub>7</sub> *      | Rh / atop                 | 100.88            | 99.43                |
| C <sub>4</sub> H <sub>10</sub>       | 142.82         | C <sub>4</sub> H <sub>9</sub> *      | Rh / atop                 | 131.52            | 129.64               |
| C <sub>5</sub> H <sub>12</sub>       | 173.64         | C <sub>5</sub> H <sub>11</sub> *     | Rh / atop                 | 162.55            | 160.27               |
| C <sub>6</sub> H <sub>14</sub>       | 204.29         | C <sub>6</sub> H <sub>13</sub> *     | Rh / atop                 | 193.25            | 190.55               |
| CH <sub>4</sub>                      | 50.08          | CH <sub>3</sub> *                    | Cu / fcc                  | 38.11             | 37.63                |
| C <sub>2</sub> H <sub>6</sub>        | 81.48          | C <sub>2</sub> H <sub>5</sub> *      | Ni / fcc                  | 68.29             | 67.66                |
| C <sub>3</sub> H <sub>8</sub>        | 112.26         | C <sub>3</sub> H <sub>7</sub> *      | Cu / fcc                  | 100.32            | 98.47                |
| C <sub>4</sub> H <sub>10</sub>       | 142.82         | C <sub>4</sub> H <sub>9</sub> * ##   | Cu / fcc                  | 131.39            | 128.99               |
| C <sub>5</sub> H <sub>12</sub>       | 173.64         | C <sub>5</sub> H <sub>11</sub> *     | Cu / fcc                  | 162.12            | 159.46               |
| C <sub>6</sub> H <sub>14</sub>       | 204.29         | C <sub>6</sub> H <sub>13</sub> * ##  | Cu / fcc                  | 192.89            | 189.97               |
| C <sub>2</sub> H <sub>5</sub> OH     | 87.70          | C <sub>2</sub> H <sub>5</sub> O*     | Pt / atop                 | 76.16             | 74.66                |
| C <sub>3</sub> H <sub>7</sub> OH     | 118.57         | C <sub>3</sub> H <sub>7</sub> O*     | Pt / atop                 | 107.30            | 105.34               |
| C <sub>4</sub> H <sub>9</sub> OH     | 149.27         | C <sub>4</sub> H <sub>9</sub> O*     | Pt / atop                 | 138.06            | 135.71               |
| C <sub>5</sub> H <sub>11</sub> OH    | 179.97         | C <sub>5</sub> H <sub>11</sub> O*    | Pt / atop                 | 168.90            | 166.09               |
| C <sub>6</sub> H <sub>13</sub> OH    | 210.74         | C <sub>6</sub> H <sub>13</sub> O* ## | Pt / atop                 | 199.74            | 196.62               |
| C <sub>3</sub> H <sub>6</sub> O      | 92.72          | C <sub>3</sub> H <sub>5</sub> O*     | Pt / atop                 | 83.34             | 81.62                |
| C <sub>4</sub> H <sub>8</sub> O      | 123.39         | C <sub>4</sub> H <sub>7</sub> O*     | Pt / atop                 | 114.25            | 112.07               |
| C <sub>5</sub> H <sub>10</sub> O     | 154.11         | C <sub>5</sub> H <sub>9</sub> O*     | Pt / atop                 | 145.05            | 142.34               |
| C <sub>6</sub> H <sub>12</sub> O     | 184.79         | C <sub>6</sub> H <sub>11</sub> O*    | Pt / atop                 | 175.94            | 172.91               |
| (CH <sub>3</sub> ) <sub>2</sub> CHOH | 117.72         | (CH <sub>3</sub> ) <sub>2</sub> CHO* | Pt / atop                 | 106.31            | 104.46               |
| (CH <sub>3</sub> ) <sub>2</sub> CO   | 92.31          | CH <sub>3</sub> COCH <sub>2</sub> *  | Pt / atop                 | 82.02             | 80.69                |
| C <sub>2</sub> H <sub>4</sub>        | 56.62          | C <sub>2</sub> H <sub>3</sub> *      | Pt / atop                 | 45.97             | 45.27                |
| C <sub>3</sub> H <sub>6</sub>        | 82.48          | C <sub>3</sub> H <sub>5</sub> *      | Pt / atop                 | 76.77             | 75.52                |

|                                               |        |                                                 |           |        |        |
|-----------------------------------------------|--------|-------------------------------------------------|-----------|--------|--------|
| C <sub>4</sub> H <sub>8</sub>                 | 113.18 | C <sub>4</sub> H <sub>7</sub> *                 | Pt / atop | 107.59 | 105.96 |
| C <sub>5</sub> H <sub>10</sub>                | 143.97 | C <sub>5</sub> H <sub>9</sub> *                 | Pt / atop | 138.49 | 136.54 |
| C <sub>2</sub> H <sub>5</sub> NH <sub>2</sub> | 101.00 | C <sub>2</sub> H <sub>5</sub> NH*               | Pt / atop | 89.36  | 87.91  |
| C <sub>2</sub> H <sub>5</sub> NH <sub>2</sub> | 101.00 | C <sub>2</sub> H <sub>4</sub> NH <sub>2</sub> * | Pt / atop | 90.74  | 89.27  |
| C <sub>3</sub> H <sub>7</sub> NH <sub>2</sub> | 131.79 | C <sub>3</sub> H <sub>7</sub> NH*               | Pt / atop | 120.36 | 118.44 |
| C <sub>4</sub> H <sub>9</sub> NH <sub>2</sub> | 162.46 | C <sub>4</sub> H <sub>9</sub> NH* ##            | Pt / atop | 151.26 | 148.82 |

**Table S3.** The percent contribution of partitional components to the total gas-phase entropy for propane and hexane.

| Partition Function | Molecule | Percent contribution to total entropy |
|--------------------|----------|---------------------------------------|
| Vibrational        | Propane  | 8.7%                                  |
|                    | Hexane   | 25.6%                                 |
| Translational      | Propane  | 58.1%                                 |
|                    | Hexane   | 44.8%                                 |
| Rotational         | Propane  | 33.2%                                 |
|                    | Hexane   | 29.6%                                 |

**Table S4.** DFT-obtained data for listed reactions in propane and ethane hydrogenolysis on Ru(0001) used for constructing Figures 4 and 5 in the main text.

| Elementary reaction steps used for DFT-derived scaling relations                                              |                                                                                                                |
|---------------------------------------------------------------------------------------------------------------|----------------------------------------------------------------------------------------------------------------|
| C-C Bond Scission                                                                                             | C-H Bond Scission                                                                                              |
| CC* + * ⇌ C* + C*                                                                                             | CH* + * ⇌ C* + H*                                                                                              |
| CCCH <sub>2</sub> * + * ⇌ C* + CCH <sub>2</sub> *                                                             | CHC* + * ⇌ CC* + H*                                                                                            |
| CHCC* + * ⇌ CH* + CC*                                                                                         | CH <sub>2</sub> * + * ⇌ CH* + H*                                                                               |
| CHCH* + * ⇌ CH* + CH*                                                                                         | CH <sub>2</sub> C* + * ⇌ CHC* + H*                                                                             |
| CH <sub>2</sub> C* + * ⇌ CH <sub>2</sub> * + C*                                                               | CH <sub>3</sub> * + * ⇌ CH <sub>2</sub> * + H*                                                                 |
| CH <sub>2</sub> CCH <sub>2</sub> * + * ⇌ CH <sub>2</sub> * + CCH <sub>2</sub> *                               | CH <sub>3</sub> C* + * ⇌ CH <sub>2</sub> C* + H*                                                               |
| CH <sub>2</sub> CH <sub>2</sub> * + * ⇌ CH <sub>2</sub> * + CH <sub>2</sub> *                                 | CH <sub>3</sub> CCH* + * ⇌ CH <sub>2</sub> CCH* + H*                                                           |
| CH <sub>2</sub> CH* + * ⇌ CH <sub>2</sub> * + CH*                                                             | CH <sub>3</sub> CH <sub>2</sub> * + * ⇌ CH <sub>2</sub> CH <sub>2</sub> * + H*                                 |
| CH <sub>2</sub> CCH* + * ⇌ CH <sub>2</sub> C* + CH*                                                           | CH <sub>3</sub> CH* + * ⇌ CH <sub>2</sub> CH* + H*                                                             |
| CH <sub>2</sub> CHCH* + * ⇌ CH <sub>2</sub> CH* + CH*                                                         | CH <sub>2</sub> CH* + * ⇌ CH <sub>2</sub> C* + H*                                                              |
| CH <sub>3</sub> C* + * ⇌ CH <sub>3</sub> * + C*                                                               | CH <sub>2</sub> CH <sub>2</sub> * + * ⇌ CH <sub>2</sub> CH* + H*                                               |
| CH <sub>3</sub> CCH <sub>3</sub> * + * ⇌ CH <sub>3</sub> * + CCH <sub>3</sub> *                               | CH <sub>4</sub> * + * ⇌ CH <sub>3</sub> * + H*                                                                 |
| CH <sub>3</sub> CH <sub>2</sub> * + * ⇌ CH <sub>3</sub> * + CH <sub>2</sub> *                                 | CH <sub>3</sub> CH* + * ⇌ CH <sub>3</sub> C* + H*                                                              |
| CH <sub>3</sub> CH* + * ⇌ CH <sub>3</sub> * + CH*                                                             | CH <sub>3</sub> CCH <sub>2</sub> * + * ⇌ CH <sub>3</sub> CCH* + H*                                             |
| CH <sub>3</sub> CHCH <sub>3</sub> * + * ⇌ CH <sub>3</sub> * + CHCH <sub>3</sub> *                             | CH <sub>3</sub> CH <sub>2</sub> * + * ⇌ CH <sub>3</sub> CH* + H*                                               |
| CH <sub>3</sub> CC* + * ⇌ CH <sub>3</sub> C* + C*                                                             | CH <sub>3</sub> CH <sub>2</sub> CH <sub>2</sub> * + * ⇌ CH <sub>3</sub> CHCH <sub>2</sub> * + H*               |
| CH <sub>3</sub> CCH* + * ⇌ CH <sub>3</sub> C* + CH*                                                           | CH <sub>3</sub> CH <sub>2</sub> CH <sub>3</sub> * + * ⇌ CH <sub>3</sub> CHCH <sub>3</sub> * + H*               |
| CH <sub>3</sub> CHCH <sub>2</sub> * + * ⇌ CH <sub>3</sub> CH* + CH <sub>2</sub> *                             | CH <sub>3</sub> CH <sub>3</sub> * + * ⇌ CH <sub>3</sub> CH <sub>2</sub> * + H*                                 |
| CH <sub>3</sub> CH <sub>2</sub> C* + * ⇌ CH <sub>3</sub> CH <sub>2</sub> * + C*                               | CH <sub>3</sub> CH <sub>2</sub> CH <sub>2</sub> * + * ⇌ CH <sub>3</sub> CH <sub>2</sub> CH* + H*               |
| CH <sub>3</sub> CH <sub>2</sub> CH <sub>2</sub> * + * ⇌ CH <sub>3</sub> CH <sub>2</sub> * + CH <sub>2</sub> * | CH <sub>3</sub> CH <sub>2</sub> CH <sub>3</sub> * + * ⇌ CH <sub>3</sub> CH <sub>2</sub> CH <sub>2</sub> * + H* |

|                                                                                   |                                                                                    |
|-----------------------------------------------------------------------------------|------------------------------------------------------------------------------------|
| CH <sub>3</sub> CH <sub>2</sub> CH* + * ⇌ CH <sub>3</sub> CH <sub>2</sub> * + CH* | CH <sub>2</sub> CHCH <sub>2</sub> * + * ⇌ CH <sub>2</sub> CHCH* + H*               |
| CHCCH* + * ⇌ CHC* + CH*                                                           | CH <sub>3</sub> CHCH <sub>3</sub> * + * ⇌ CH <sub>3</sub> CHCH <sub>2</sub> * + H* |
| CHCHCH* + * ⇌ CHCH* + CH*                                                         | CHCH* + * ⇌ CHC* + H*                                                              |
|                                                                                   | CH <sub>2</sub> CH* + * ⇌ CHCH* + H*                                               |
|                                                                                   | CH <sub>2</sub> CHCH <sub>2</sub> * + * ⇌ CH <sub>2</sub> CCH <sub>2</sub> * + H*  |
|                                                                                   | CH <sub>3</sub> CHCH* + * ⇌ CH <sub>3</sub> CCH* + H*                              |

## Supplementary Note S1 – Justification of Linearity for Entropic Contributors

Equations S1-S3 are first-order Taylor series expansions of each entropic contributor, where the Taylor series expansions demonstrate whether entropic contributions as a function of size may be approximated as linear or not. The translational entropy is linearized around a reference molar mass ( $m_o$ ), the rotational entropy around a reference rotational moment of inertia ( $(I_A I_B I_C)_o$ ), and the vibrational entropy around a reference frequency ( $\nu_o$ ):

$$\frac{S_{trans}}{R} = \left( \frac{3}{2} \ln \left( \frac{2\pi m_o}{h^2} \right) + \frac{5}{2} \ln(k_B T) - \ln(p) + \frac{5}{2} \right) + \left( \frac{3R}{2m_o} \right) (m - m_o), \quad S1$$

$$\frac{S_{rot}}{R} = \left( \ln \left( \frac{8\pi^2}{\sigma} \right) + \frac{3}{2} \ln \left( \frac{2\pi k_B T}{h^2} \right) + \left( \frac{1}{2} \ln(I_A I_B I_C)_o \right) + \frac{3}{2} \right) + \left( \frac{R}{2(I_A I_B I_C)_o} \right) ((I_A I_B I_C) - (I_A I_B I_C)_o), \quad S2$$

$$\frac{S_{vib}}{R} = \frac{h\nu_o}{T \left( e^{\frac{h\nu_o}{k_B T}} - 1 \right)} + \left[ \frac{h \left( e^{\frac{h\nu_o}{k_B T}} - 1 - \left( \frac{h\nu_o}{k_B T} e^{\frac{h\nu_o}{k_B T}} \right) \right)}{T \left( e^{\frac{h\nu_o}{k_B T}} - 1 \right)^2} \right] (\nu_i - \nu_o) \quad S3$$

$$-k_B \ln \left( 1 - e^{-\frac{h\nu_o}{k_B T}} \right) - \left[ \frac{h}{T \left( e^{\frac{h\nu_o}{k_B T}} - 1 \right)} \right] (\nu_i - \nu_o).$$

The rotational entropy also contains the symmetry number  $\sigma$ , but this term is unrelated to the size of the molecule, so it is taken as a constant in the Taylor series expansion. Figure S7 shows parity plots of the Taylor expansion against the calculated entropic component. For the translational and rotational entropies, deviations from the true value using the Taylor expansion indicate the nonlinear nature of the mass-dependent component. For translational entropy (Figure S7a), there is a logarithmic dependence on the molar mass, although in a given range or tolerance, the relation could be approximated as linear. For rotational entropy (Figure S7b), the logarithmic nature of the curve plotted against molar mass comes from dependence on the moment of inertia. The rotational motions characterized by moments of inertia for polyatomic molecules are determined from components of the inertial tensor, which contains elements directly dependent on the mass and coordinates of atoms. The vibrational entropy successively increases for the C<sub>1</sub>-C<sub>6</sub> alkane \ alkyl homologous series as the vibrational degrees of freedom increase. The Taylor series expansion around a reference frequency validates how individual vibrational frequencies are linearly correlated between molecules of different sizes, thus establishing the linearity of thermochemical scaling relationships. Figure S7c and S7d demonstrate this; vibrational entropies calculated for individual frequencies for c) butane and d) butyl are linearized around a corresponding frequency from c) propane and

d) propyl. The reference frequencies are determined using a rolling correlation, which measures the correlation between two series on a rolling window. Pearson correlation coefficients are calculated from rolling correlations where all possible individual entropic configurations are mapped from a larger to a smaller array. The highest coefficient is taken, and the frequencies in this pairing are used for the Taylor expansion.

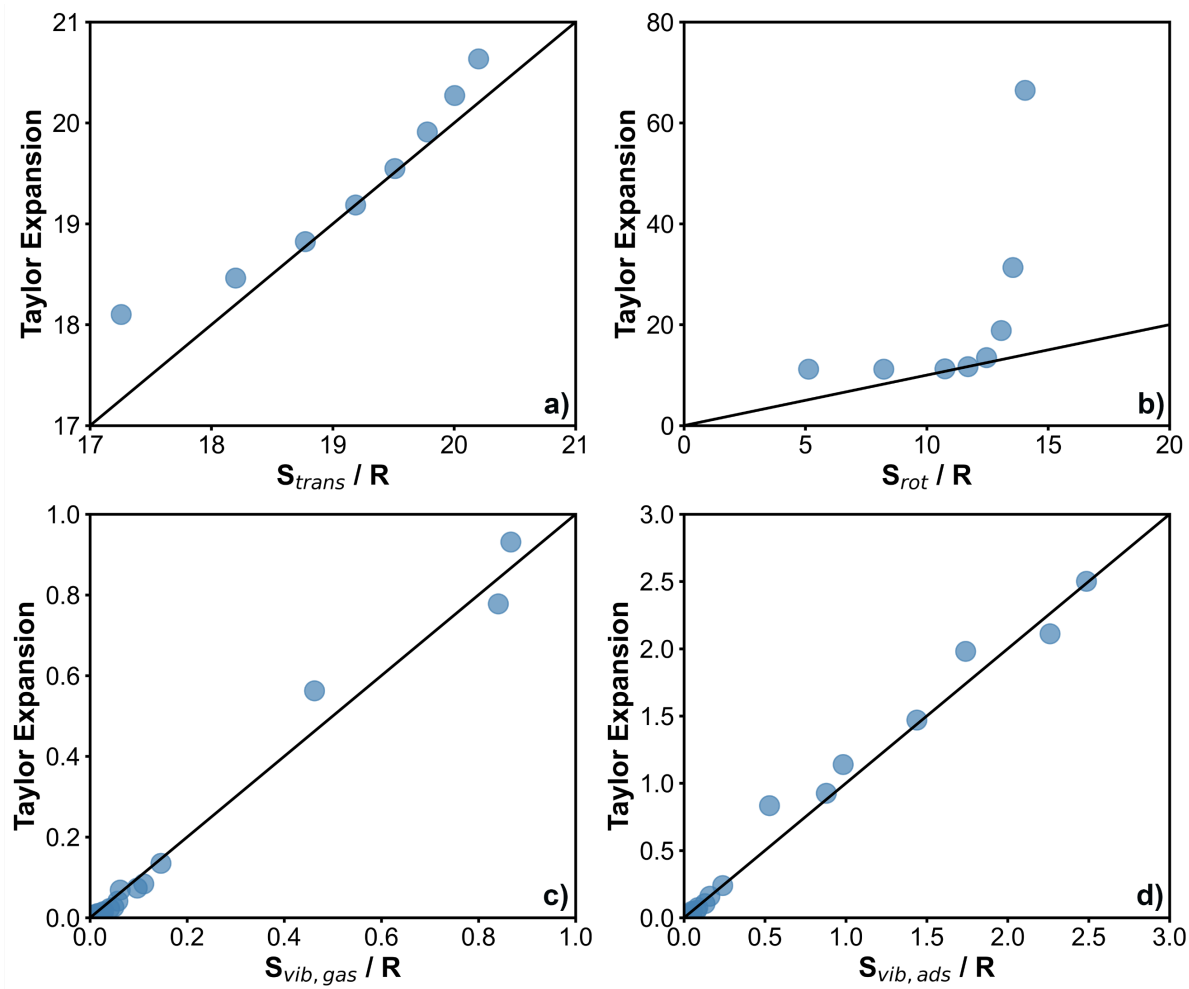

**Figure S7.** First-order Taylor series expansion plotted against **a)** translational, **b)** rotational entropic components for  $C_1$ - $C_8$  alkanes (gas phase). Vibrational entropies calculated for individual frequencies for **c)** butane and **d)** butyl are linearized around a corresponding frequency from **c)** propane and **d)** propyl. Adsorbed vibrational components are calculated from the Pt(111) surface. The black line indicates parity. Quantities calculated at 298.15 K.
